# Supplementary material for: Comparative Study of the Aftereffect of CO2 Inhalation or Tiletamine–Zolazepam–Xylazine Anesthesia on Laboratory Outbred Rats and Mice
Source: MDPI journal article supplement (doi:10.3390/biomedicines10020512), 2022-02-21
Supplement: s1 [file s1]

## Supplementary Materials:

### Comparative Study of the Aftereffect of CO<sub>2</sub>-Inhalation or Tiletamine-Zolazepam-Xylazine Anesthesia on Laboratory Outbred Rats and Mice

Oksana N. Khokhlova, Natalya A. Borozdina, Elena S. Sadovnikova, Irina A. Pakhomova, Pavel A. Rudenko, Yuliya V. Korolkova, Sergey A. Kozlov, Igor A. Dyachenko

Table S1. Blood glucose level in males and females CD-1 mice in the awake state and after CO<sub>2</sub>-inhalation or tiletamine-zolazepam-xylazine (TZX) anesthesia

|      | males                     |                 | females       |            |                           |                 |               |            |
|------|---------------------------|-----------------|---------------|------------|---------------------------|-----------------|---------------|------------|
|      | before<br>CO <sub>2</sub> | CO <sub>2</sub> | before<br>TZX | TZX        | before<br>CO <sub>2</sub> | CO <sub>2</sub> | before<br>TZX | TZX        |
|      | 8,1                       | 10,9            | 6,8           | 7,7        | 8,2                       | 9,7             | 5,4           | 7,2        |
|      | 8,7                       | 11,4            | 8,3           | 6,7        | 7,5                       | 8,8             | 6,3           | 7,5        |
|      | 7,6                       | 9,2             | 8,3           | 9,8        | 6,3                       | 11,4            | 7,8           | 6,4        |
|      | 7,2                       | 8,8             | 7             | 10,3       | 6,9                       | 8,1             | 5,7           | 8,2        |
|      | 6,9                       | 11,4            | 7,9           | 13,8       | 7,1                       | 6,1             | 5,2           | 8,4        |
|      | 8                         | 12,7            | 8,8           | 7,2        | 7,3                       | 11,4            | 6,3           | 6,1        |
|      | 7,4                       | 12,4            | 7,7           | 8,1        | 6,3                       | 9,8             | 6,3           | 7,1        |
|      | 6,6                       | 10,6            | 7,8           | 10,7       | 5,9                       | 7,7             | 6,4           | 8,1        |
|      | 7,2                       | 10,3            | 8,7           | 11,8       | 6,4                       | 5,5             | 6,2           | 6,8        |
|      | 8,2                       | 8,2             | 6,4           | 7,1        | 6,8                       | 6,2             | 7,8           | 9,3        |
| MEAN | <b>7,6</b>                | <b>10,6</b>     | <b>7,8</b>    | <b>9,3</b> | <b>6,9</b>                | <b>8,5</b>      | <b>6,3</b>    | <b>7,5</b> |
| SD   | <b>0,7</b>                | <b>1,5</b>      | <b>0,8</b>    | <b>2,4</b> | <b>0,7</b>                | <b>2,1</b>      | <b>0,9</b>    | <b>1,0</b> |

Table S2. Blood glucose level in males and females Sprague-Dawley rats in the awake state and after CO<sub>2</sub>-inhalation or tiletamine-zolazepam-xylazine (TZX) anesthesia

|      | males                     |                 | females       |            |                           |                 |               |            |
|------|---------------------------|-----------------|---------------|------------|---------------------------|-----------------|---------------|------------|
|      | before<br>CO <sub>2</sub> | CO <sub>2</sub> | before<br>TZX | TZX        | before<br>CO <sub>2</sub> | CO <sub>2</sub> | before<br>TZX | TZX        |
|      | 3,7                       | 4,9             | 3,7           | 4,9        | 4,5                       | 6,6             | 4,8           | 6,7        |
|      | 4,8                       | 7,1             | 4,5           | 6,4        | 5,3                       | 6,2             | 5,1           | 5,2        |
|      | 4,4                       | 4,8             | 4,6           | 6,8        | 5                         | 6,4             | 4,2           | 7,3        |
|      | 4,2                       | 4,3             | 5,1           | 6,1        | 4,4                       | 5,8             | 3,9           | 6,4        |
|      | 4,4                       | 5,3             | 4,7           | 6          | 3,9                       | 5,7             | 4,6           | 5,4        |
|      | 4,4                       | 4,3             | 4,8           | 5,8        | 4,8                       | 5,8             | 5,3           | 5,8        |
|      | 4,2                       | 5,3             | 4,9           | 8,3        | 4,9                       | 7,1             | 4,2           | 7,1        |
|      | 5,6                       | 5,8             | 4,4           | 6,7        | 4,2                       | 5,5             | 4,2           | 5,6        |
|      | 3,8                       | 5,6             | 4             | 5,3        | 4,1                       | 5,6             | 4,8           | 6,2        |
|      | 3,8                       | 4,8             | 4,2           | 8,1        | 4,6                       | 5,9             | 4,8           | 5,6        |
| MEAN | <b>4,3</b>                | <b>5,2</b>      | <b>4,5</b>    | <b>6,4</b> | <b>4,6</b>                | <b>6,1</b>      | <b>4,6</b>    | <b>6,1</b> |
| SD   | <b>0,6</b>                | <b>0,8</b>      | <b>0,4</b>    | <b>1,1</b> | <b>0,4</b>                | <b>0,5</b>      | <b>0,5</b>    | <b>0,7</b> |
